# Supplementary material
Source: PubMed Central journal article supplement (PMC4790874)
Supplement: supp_tpc.15.00867_TPC2015-00867-RAR1_Supplemental_Data.pdf [file supp_tpc.15.00867_TPC2015-00867-RAR1_Supplemental_Data.pdf]

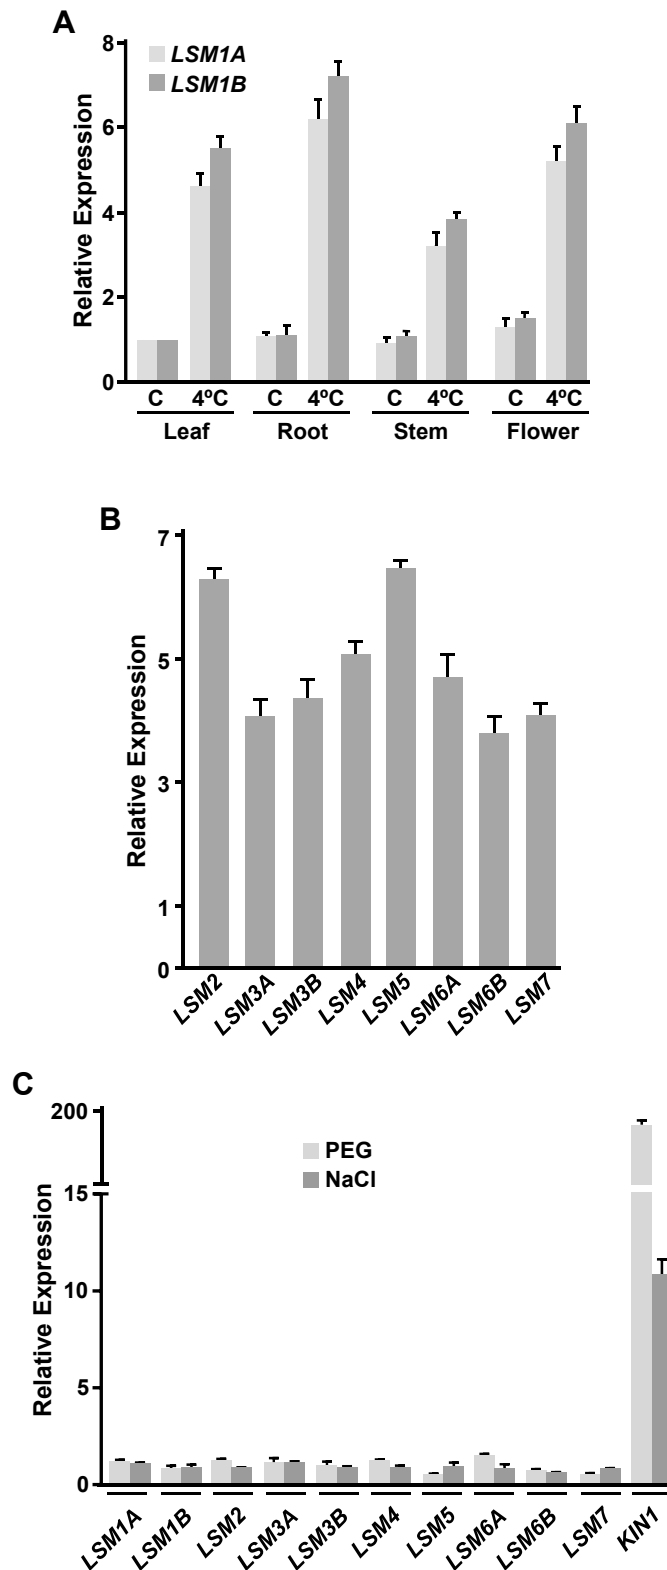

**Supplemental Figure 1. Expression analysis of Arabidopsis LSM1-7 genes in response to abiotic stresses.** (A) Expression of *LSM1A* and *LSM1B* in different organs of 8-week-old Col-0 plants grown under control conditions (C) or exposed 24h to 4°C. Levels are represented as relative to their values in control leaves. Error bars indicate the standard deviation of the mean ( $n \geq 3$ ). In all organs, differences between cold and control samples were significant ( $P \leq 0.0001$ ), as determined by ANOVA-test. (B) Expression of *LSM2-LSM7* in 2-week-old Col-0 plants exposed 24h to 4°C. Levels are represented as relative to their corresponding values under control conditions. Error bars indicate the standard deviation of the mean ( $n \geq 3$ ). For all genes, differences between cold-treated and control plants were significant ( $P \leq 0.0001$ ), as determined by ANOVA-test. (C) Expression of *LSM1-LSM7* in 2-week-old Col-0 plants exposed to 55% PEG or 150mM NaCl for 10h. Levels are represented as relative to their corresponding values under control conditions. *KIN1* was used as a positive control for treatments. Error bars indicate the standard deviation of the mean ( $n \geq 3$ ). In the case of *KIN1*, differences between stressed and control plants were significant ( $P \leq 0.0001$ ), as determined by ANOVA-test. For *LSM* genes, no significant differences between stressed and control plants were observed in any case.

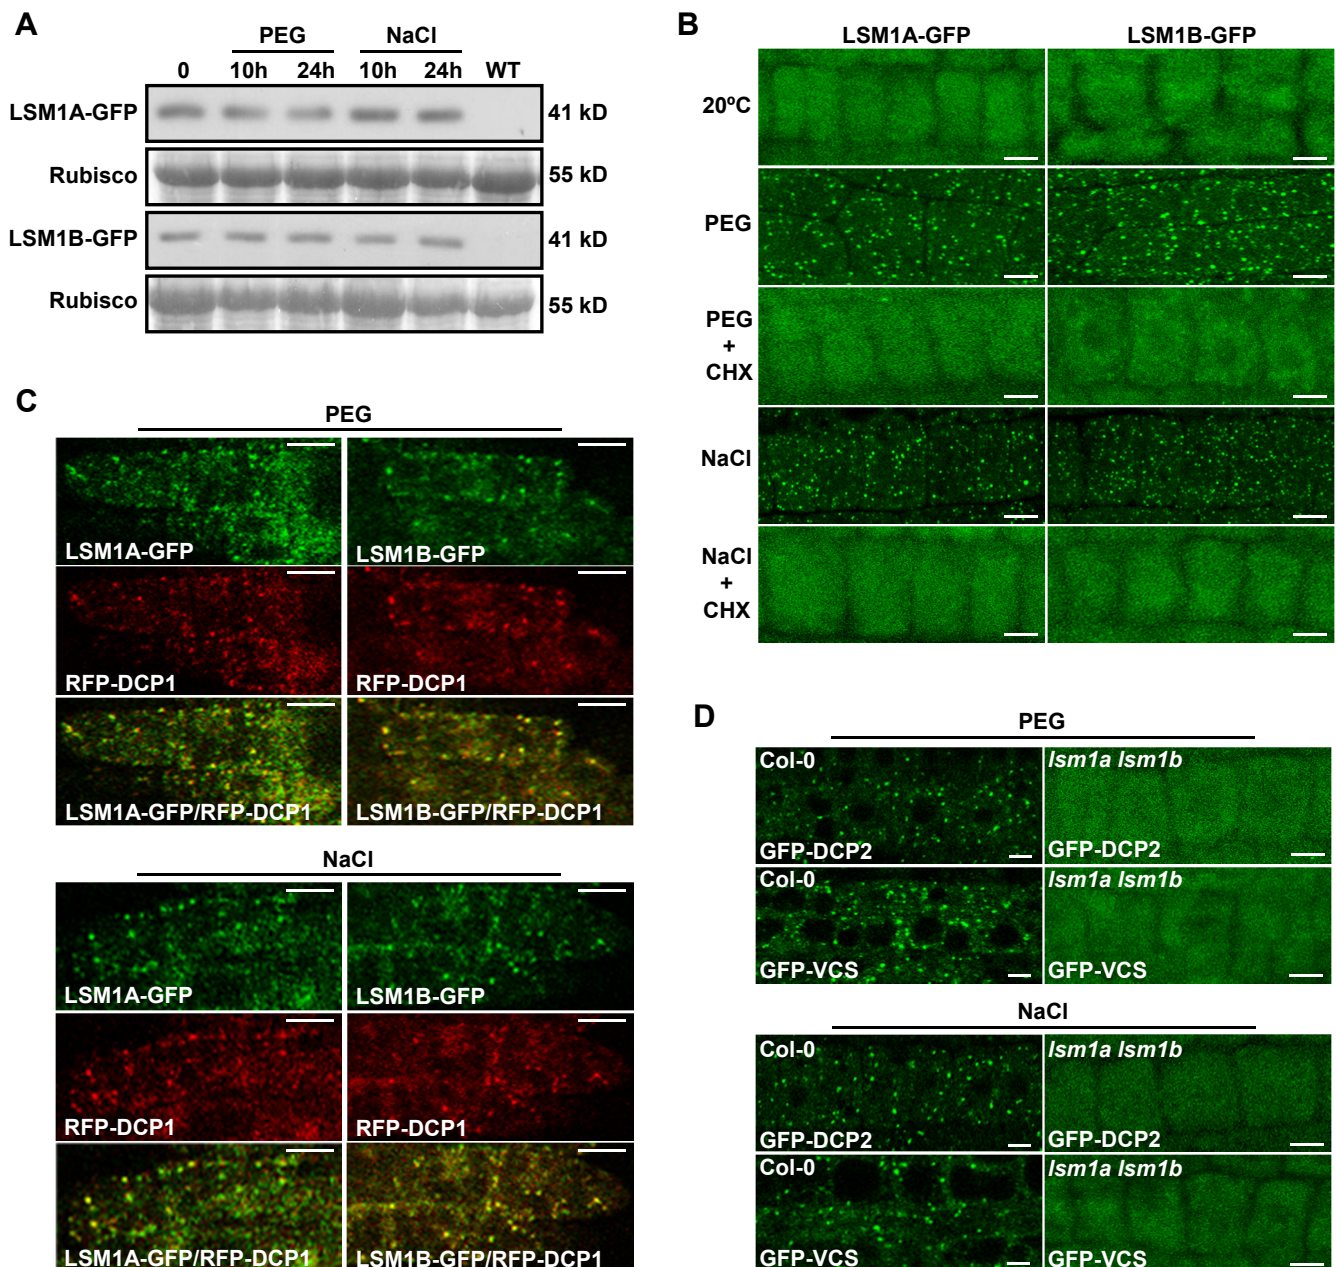

**Supplemental Figure 2. Arabidopsis LSM1 proteins do not accumulate in response to drought and salinity but localize to P-bodies under these abiotic stresses.** (A) Levels of LSM1A-GFP and LSM1B-GFP in 2-week-old transgenic Arabidopsis plants exposed for the indicated times to 55% PEG or 150mM NaCl. A lane with Col-0 plants was added as a negative control. Coomassie staining of the large subunit of Rubisco was used as a loading control. (B) Subcellular localization of LSM1A-GFP and LSM1B-GFP in root tip cells from 6-day-old transgenic Arabidopsis seedlings grown under control conditions (20°C) or exposed to 55% PEG for 10h, to 55% PEG with cycloheximide for 10h (PEG+CHX), to 150mM NaCl for 10h, and to 150mM NaCl with cycloheximide for 10h (NaCl+CHX). Bars = 20 μm. (C) Colocalization of LSM1A-GFP and LSM1B-GFP with RFP-DCP1 in root tip cells from 6-day-old transgenic Arabidopsis seedlings grown under control conditions and subsequently exposed to 55% PEG for 10h (top panel) or 150mM NaCl for 10h (bottom panel). Bars = 20 μm. (D) Subcellular localization of GFP-DCP2 and GFP-VCS in root tip cells from 6-day-old wild-type (WT) and *Ism1a Ism1b* Arabidopsis seedlings grown under control conditions and subsequently exposed to 55% PEG for 10h (top panel) or 150mM NaCl for 10h (bottom panel). Bars = 20 μm.

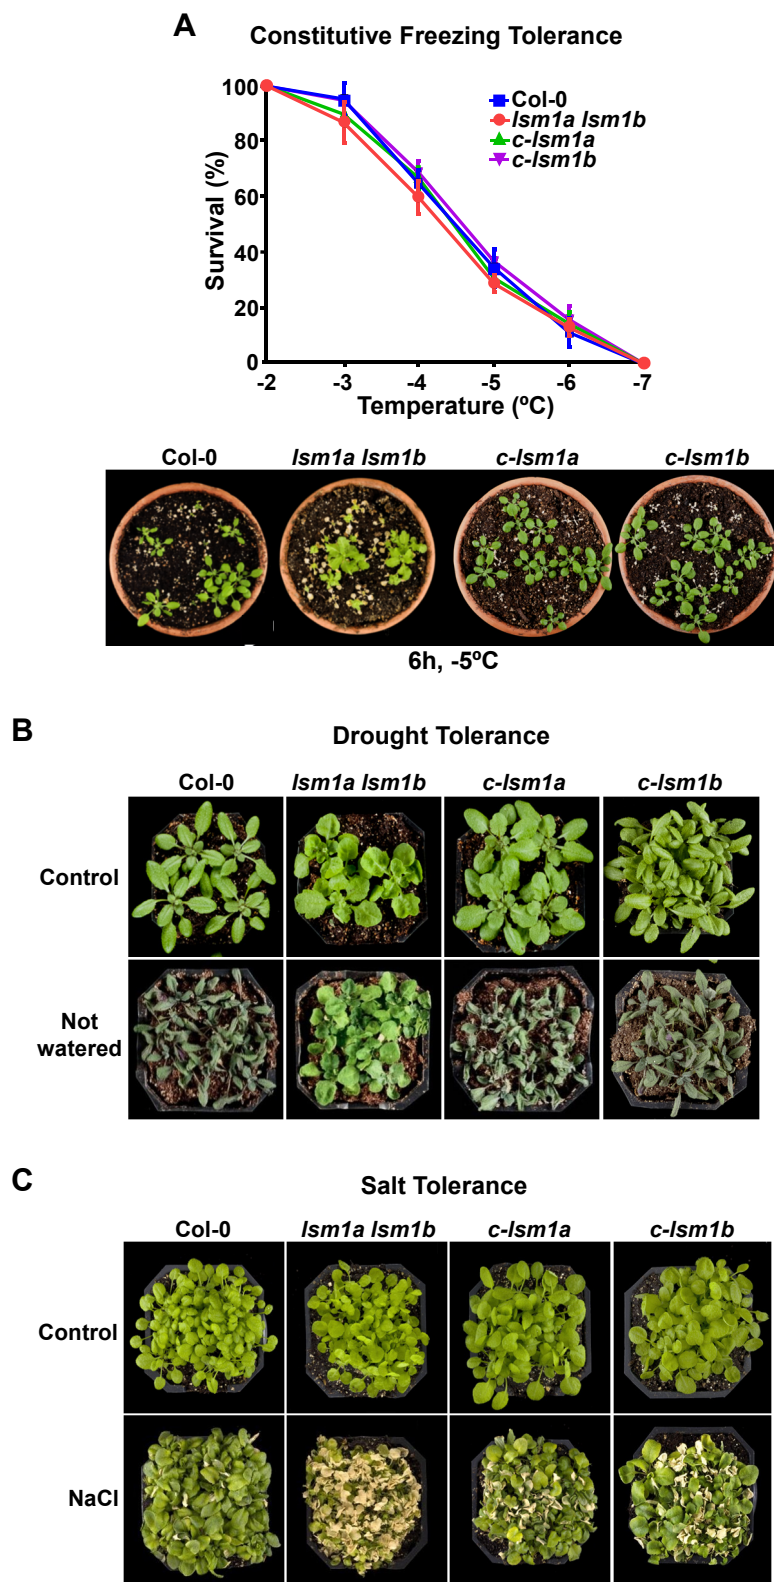

**Supplemental Figure 3. Constitutive freezing tolerance and tolerance to drought and salinity of *lsm1a lsm1b* plants grown on soil.** (A) Constitutive freezing tolerance of 2-week-old Col-0, *lsm1a lsm1b*, *c-lsm1a* and *c-lsm1b* plants. Error bars indicate the standard deviation of the mean ( $n \geq 3$ ). No significant differences between *lsm1a lsm1b* and the other plants were found in any case, as determined by ANOVA-test (top). Representative plants 7d after being exposed to -5°C for 6h (bottom). (B) Drought tolerance of 2-week-old Col-0, *lsm1a lsm1b*, *c-lsm1a* and *c-lsm1b* plants. Plants grown under control conditions (Control) were deprived of water for 10 days (Not watered). (C) Salt tolerance of 2-week-old Col-0, *lsm1a lsm1b*, *c-lsm1a* and *c-lsm1b* plants. Plants grown under control conditions (Control) were watered with 250mM NaCl during 10 days (NaCl).

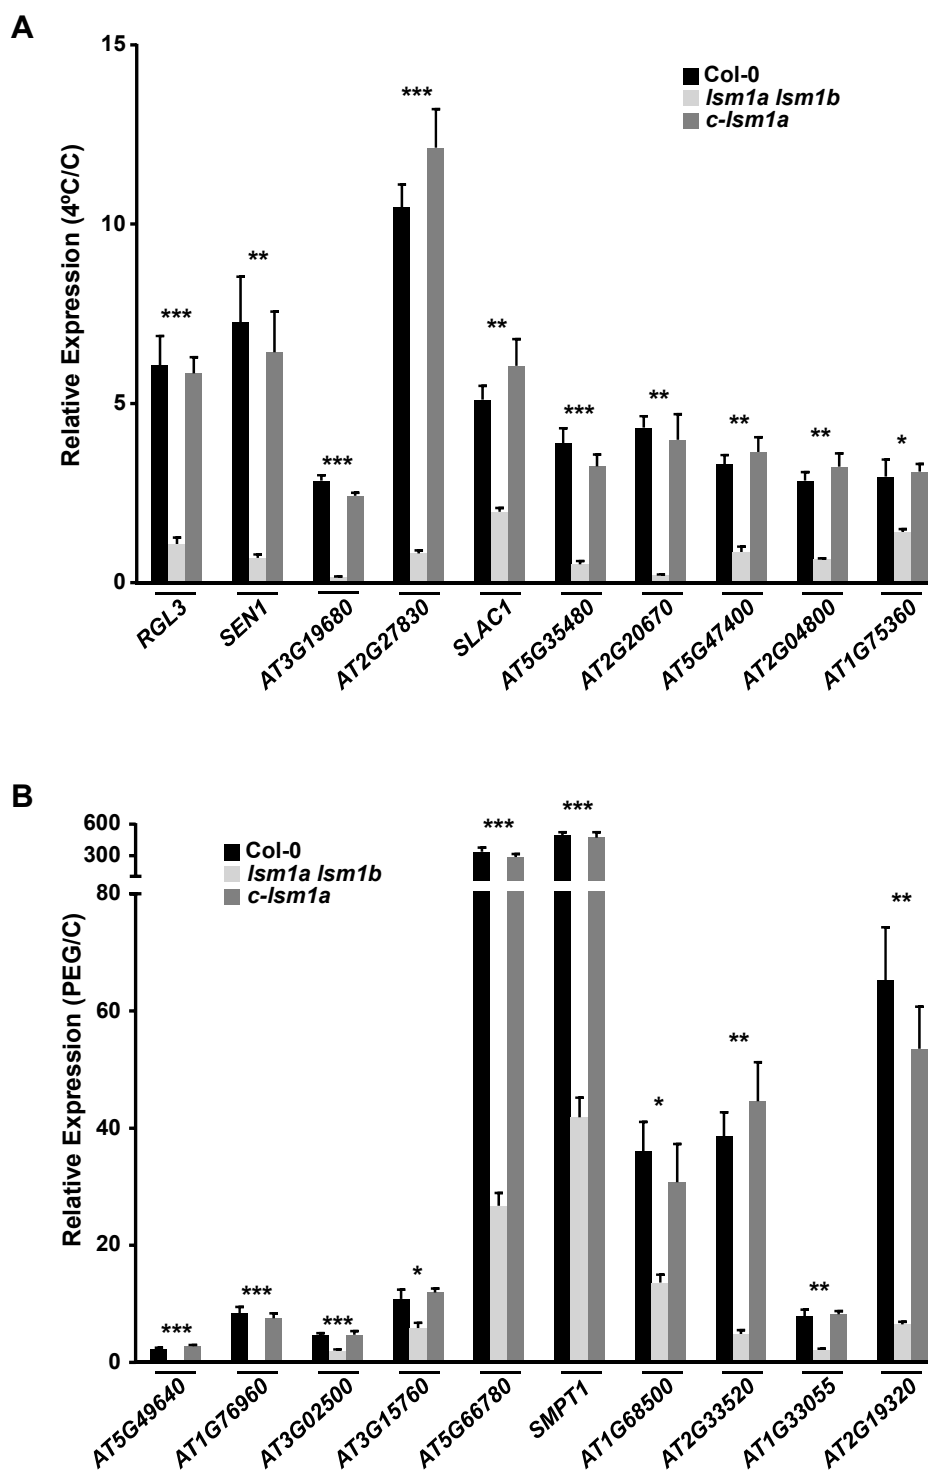

**Supplemental Figure 4. Expression levels of genes down-regulated in *Ism1a Ism1b* plants in response to cold and drought.** (A) Expression of different cold-inducible genes down-regulated in *Ism1a Ism1b*. Levels, determined by qPCR, in 2-week-old Col-0, *Ism1a Ism1b* and *c-Ism1a* plants exposed 24h to 4°C are represented as relative to their corresponding values in control plants (C). (B) Expression of different drought-inducible genes down-regulated in *Ism1a Ism1b*. Levels, determined by qPCR, in 2-week-old Col-0, *Ism1a Ism1b* and *c-Ism1a* plants exposed 10h to 55% PEG are represented as relative to their corresponding values in control plants (C). Differences between *Ism1a Ism1b* and Col-0 or *c-Ism1a* plants were always significant ( $*P \leq 0.01$ ,  $**P \leq 0.001$ ,  $***P \leq 0.0001$ ), as determined by ANOVA-test. No significant differences between Col-0 and *c-Ism1a* plants were observed in any case.

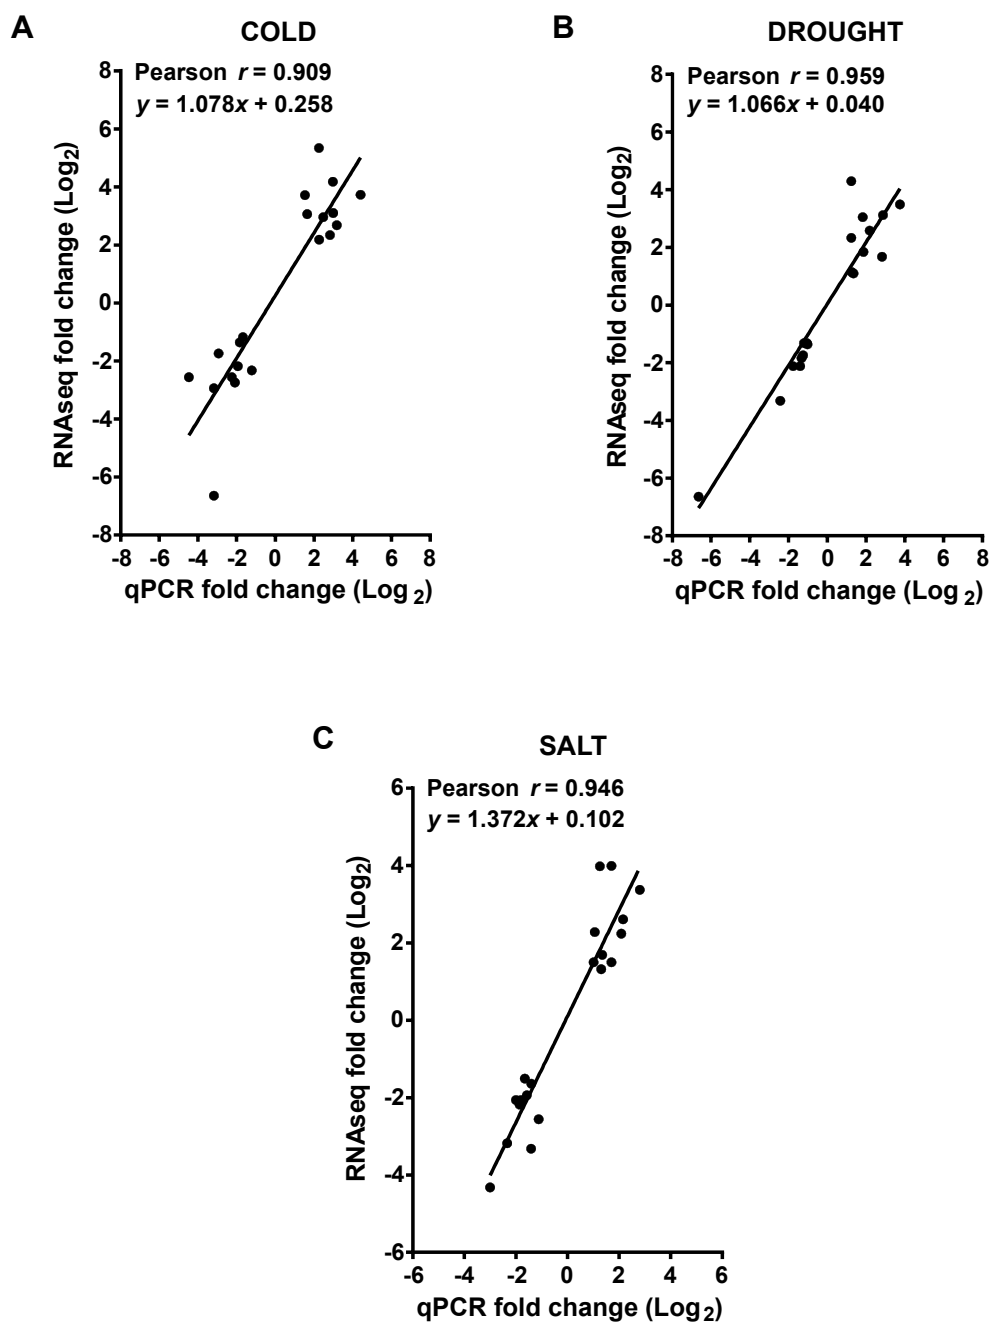

**Supplemental Figure 5. Correlation between RNAseq and qPCR results.** Comparison of log<sub>2</sub> fold change of 20 differentially expressed genes between Col-0 and *lsm1a lsm1b* plants under cold (A), drought (B) or salinity (C) obtained by RNAseq (y axis) and qPCR (x axis). A linear regression line and the calculated values of Pearson correlation coefficients (Pearson  $r$ ) are shown in each panel.

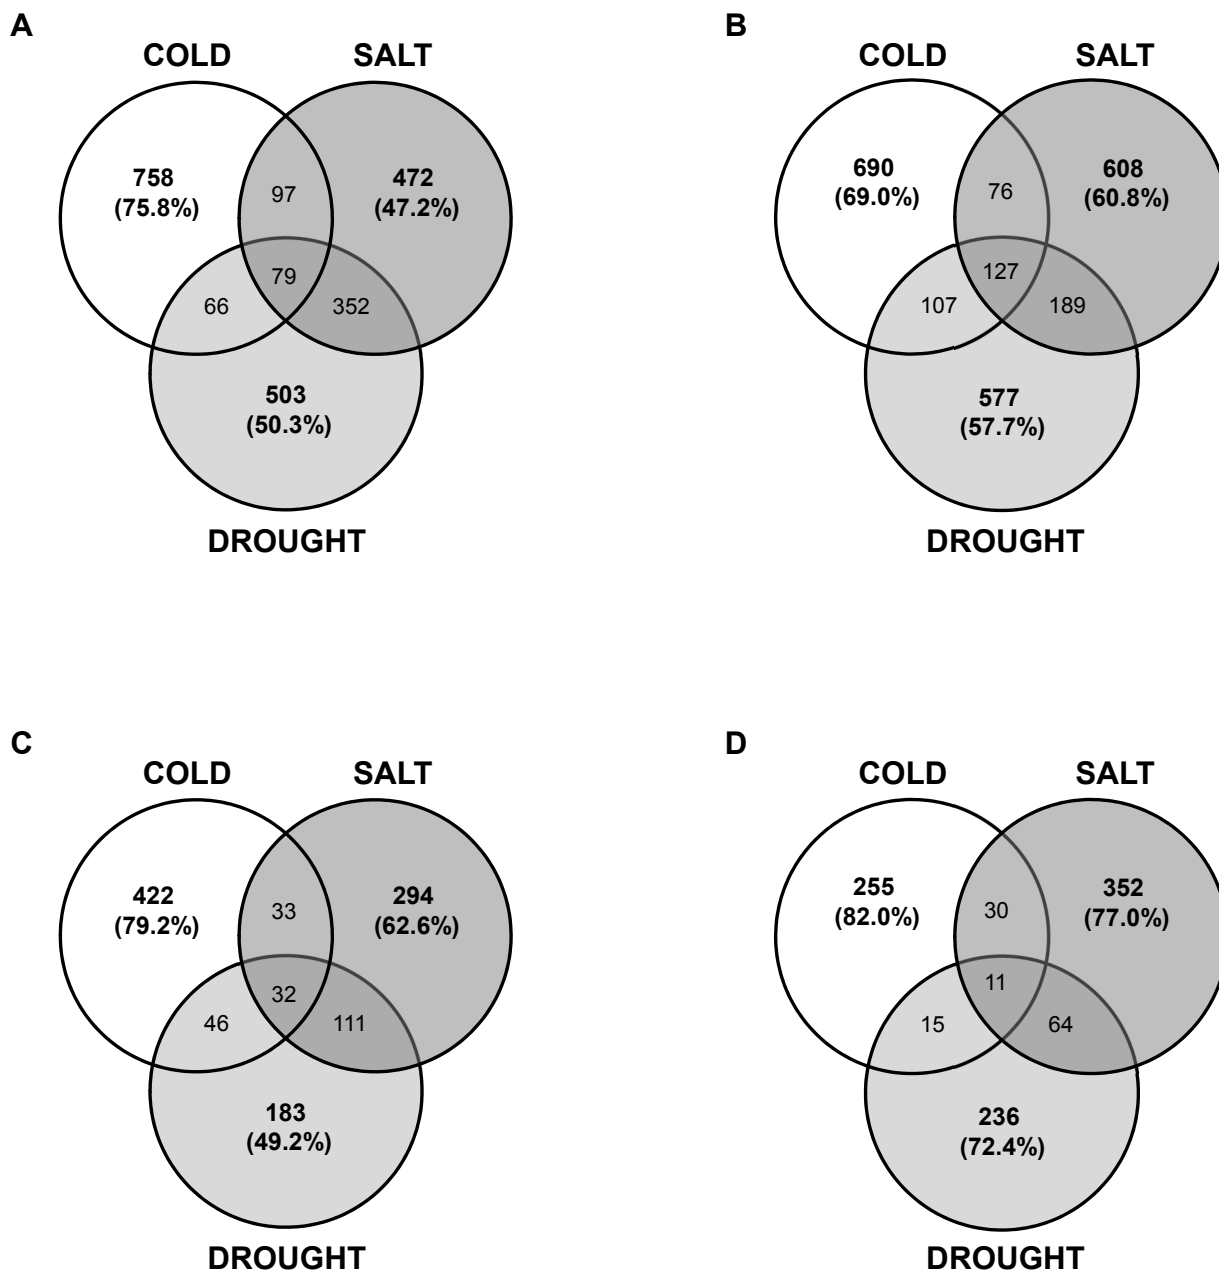

**Supplemental Figure 6. Venn diagrams of de-regulated transcripts in *Ism1a Ism1b* plants under cold, drought and salt stresses.** (A, B) Venn diagrams showing the top 1000 genes with increased (A) or decreased (B) expression in *Ism1a Ism1b* plants in response to low temperature, drought or high salt. (C, D) Venn diagrams showing the number of genes with increased (C) or decreased (D) expression in *Ism1a Ism1b* plants in response to low temperature, drought or salinity that have been described to be induced by cold, drought or high salt, respectively. In all cases, transcripts specifically de-regulated in response to a single stress are in bold and the percentages they represent relative to the total number of de-regulated genes in each case (specific and nonspecific) are indicated.

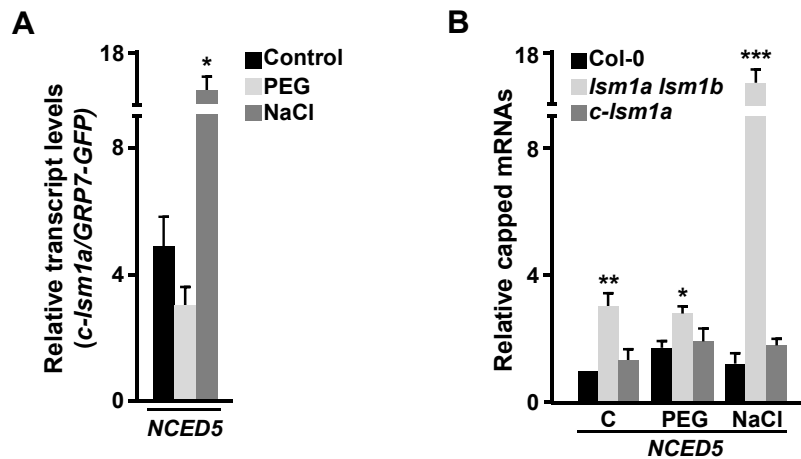

**Supplemental Figure 7. The Arabidopsis LSM1-7 complex differentially interacts with and promotes the decapping of *NCED5* transcripts in response to drought and high salt.** (A) RIP assays on 2-week-old *c-Ism1a* plants grown under control conditions (Control), exposed 10h to 55% PEG, or 10h to 150mM NaCl, using an anti-GFP antibody. RIP assays on Arabidopsis containing a *GRP7<sub>PRO</sub>-GRP7-GFP* fusion grown under control and stressed conditions were also carried out as interaction specificity controls. Co-immunoprecipitated RNA samples corresponding to *NCED5* genes were quantified by qPCR. Transcript levels in *c-Ism1a* plants were corrected with respect to their corresponding input values and represented relative to the levels obtained from RIP control assays. Error bars indicate the standard deviation of the mean ( $n \geq 3$ ). Asterisks (\*) indicate significant differences ( $*P \leq 0.01$ ) in transcript levels between RIP assays from stressed and control plants, as determined by ANOVA-test. (B) Capped transcripts in 2-week-old Col-0, *Ism1a Ism1b* and *c-Ism1a* plants grown under control conditions (C), exposed 10h to 55% PEG, or 10h to 150mM NaCl. The levels of capped transcripts corresponding to *NCED5* genes were corrected with respect to the levels of their corresponding total transcripts and represented relative to control Col-0 plants. Error bars indicate the standard deviation of the mean ( $n \geq 3$ ). Asterisks (\*) indicate significant differences ( $*P \leq 0.01$ ,  $**P \leq 0.001$ ,  $***P \leq 0.0001$ ) between *Ism1a Ism1b* and Col-0 or *c-Ism1a* plants, as determined by ANOVA-test. No significant differences between Col-0 and *c-Ism1a* plants were observed in any case.
